# Supplementary material for: Inhibition of E-Selectin (GMI-1271) or E-selectin together with CXCR4 (GMI-1359) re-sensitizes multiple myeloma to therapy
Source: PubMed Central journal article supplement (PMC6702213; doi:10.1038/s41408-019-0227-3), 2019-08-20
Supplement: 41408_2019_227_MOESM2_ESM.pdf [file 41408_2019_227_MOESM2_ESM.pdf]

# Supplementary Figure 1

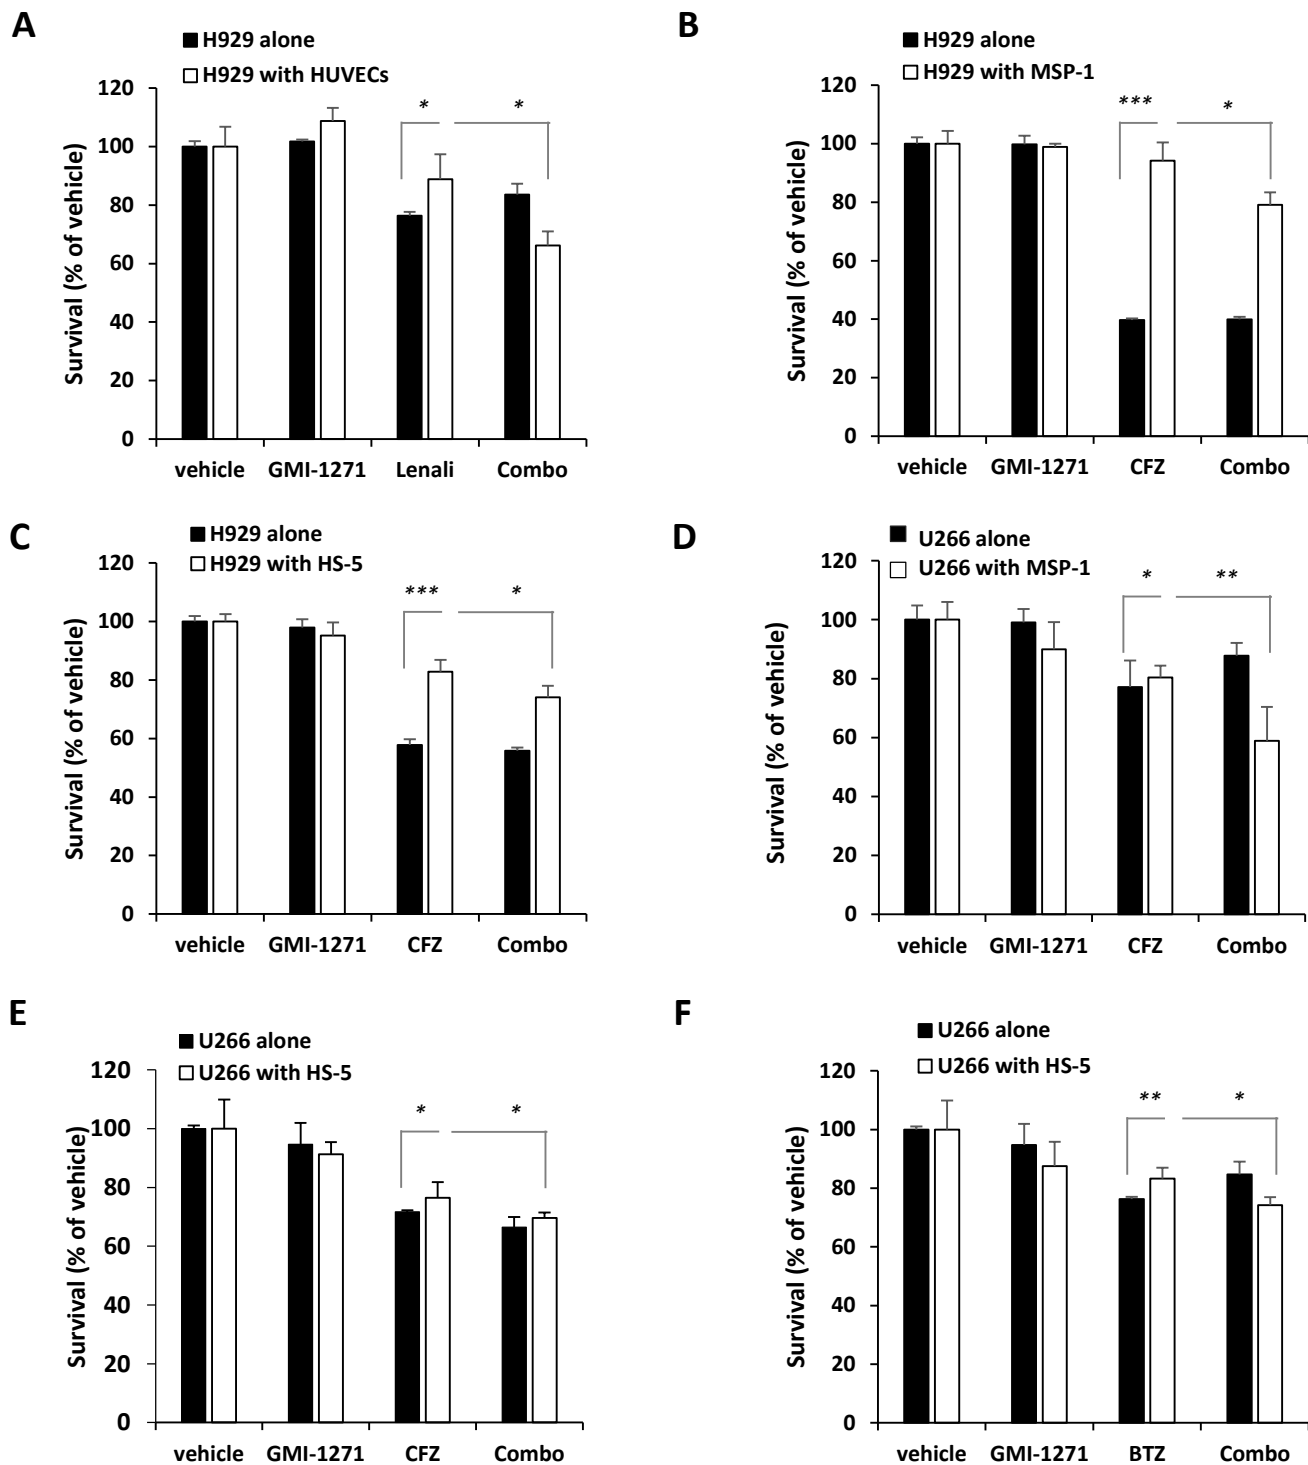

**Supplementary Figure 1 Combination of GMI-1271 with lenalidomide, carfilzomib or bortezomib overcomes stroma-induced drug resistance in vitro.** Survival of H929 cells treated with GMI-1271 (20  $\mu$ M) and cultured with or without HUVECs +/- lenalidomide (Lenali, 1  $\mu$ M) (A), with or without MSP-1 +/- carfilzomib (CFZ, 5nM) (B), and with or without HS-5 +/- CFZ (C). Survival of U266 cells treated with GMI-1271 (20  $\mu$ M) and cultured with or without MSP-1 +/- CFZ (5 nM) (D), with or without HS-5 +/- CFZ (E), and with or without HS-5 +/- BTZ (5 nM) (F). Survival of MM cells was tested at 24 hours using MTT assay. Results are representative of at least three independent experiments and demonstrated as mean  $\pm$  s.e.m. with statistical significance for p values less than 0.05 calculated using unpaired Student's t-test (\* $p$ <0.05; \*\* $p$ <0.01; \*\*\* $p$ <0.001).

# Supplementary Figure 2

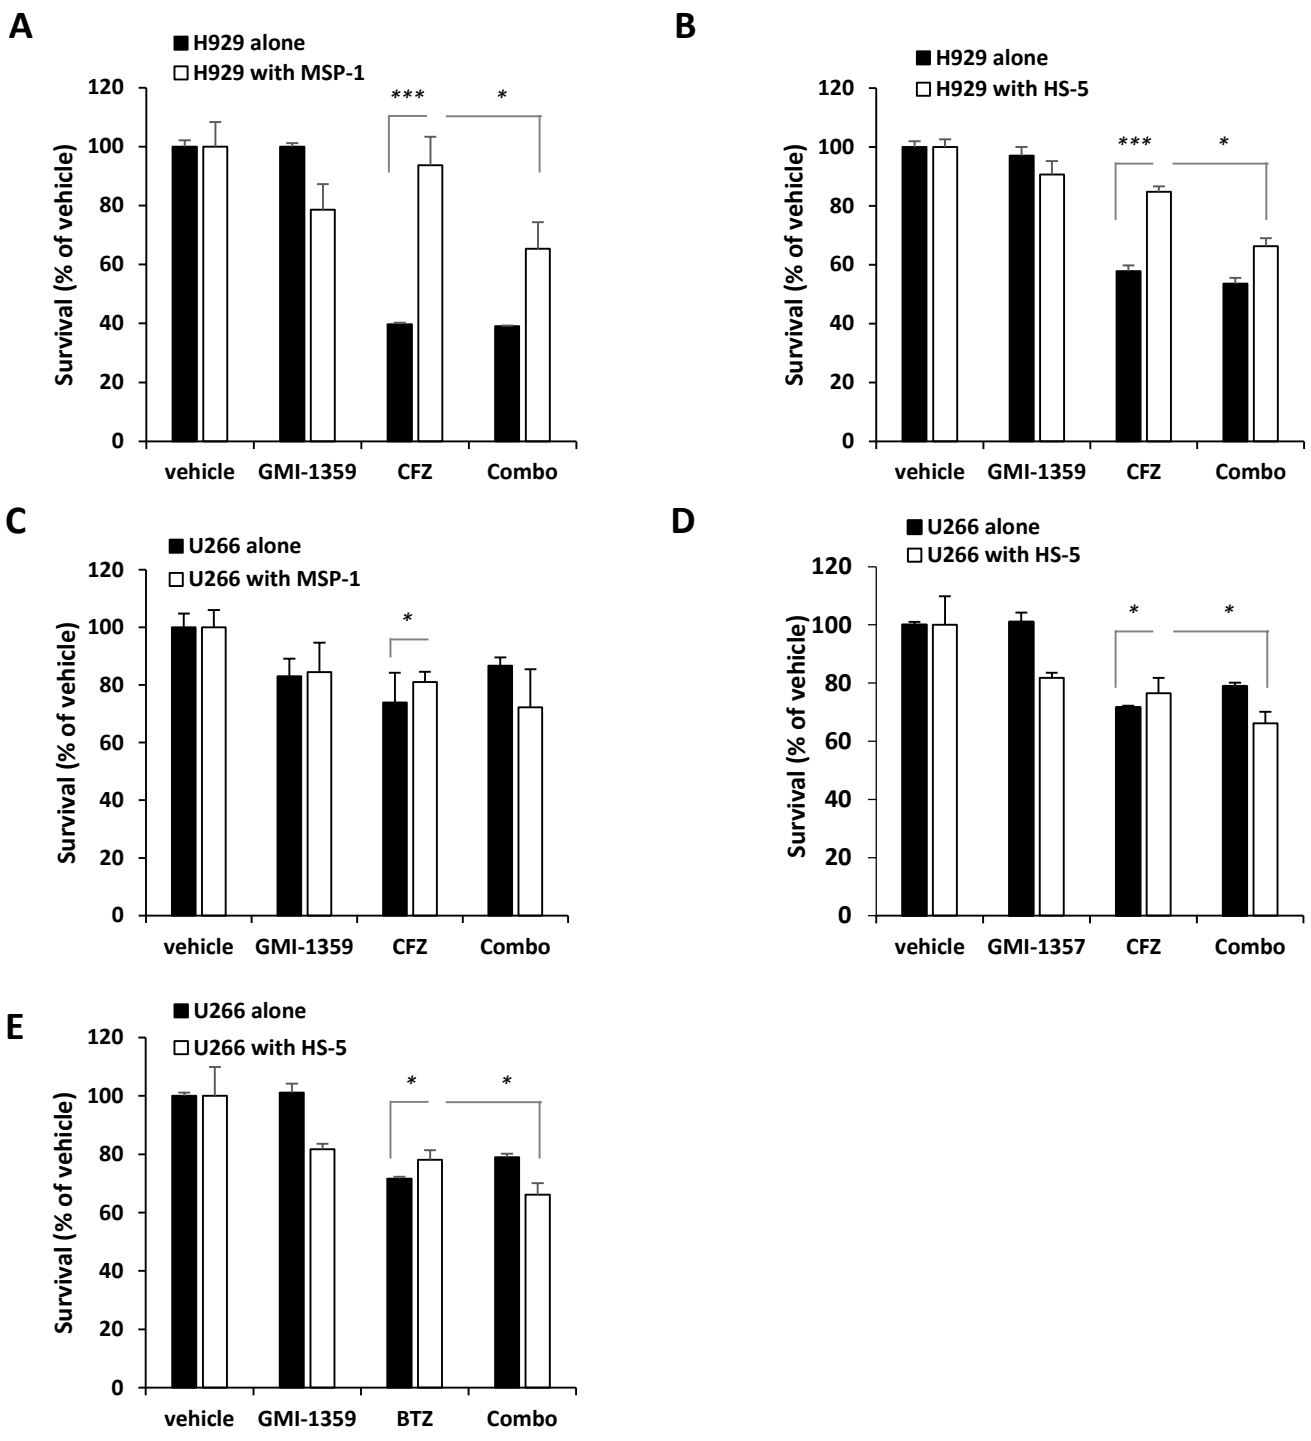

**Supplementary Figure 2 Combination of GMI-1359 with carfilzomib or bortezomib overcomes stroma-induced drug resistance in vitro.** Survival of H929 cells treated with GMI-1359 (20  $\mu$ M) and cultured with or without MSP-1 +/- carfilzomib (CFZ, 5nM) **(A)**, and with or without HS-5 +/- CFZ **(B)**. Survival of U266 cells treated with GMI-1359 (20  $\mu$ M) and cultured with or without MSP-1 +/- CFZ (5 nM) **(C)**, with or without HS-5 +/- CFZ **(D)**, and with or without HS-5 +/- BTZ (5 nM) **(E)**. Survival of MM cells was tested at 24 hours using MTT assay. Results are representative of at least three independent experiments and demonstrated as mean  $\pm$  s.e.m. with statistical significance for  $p$  values less than 0.05 calculated using unpaired Student's  $t$ -test (\* $p$ <0.05; \*\*\* $p$ <0.001).

# Supplementary Figure 3

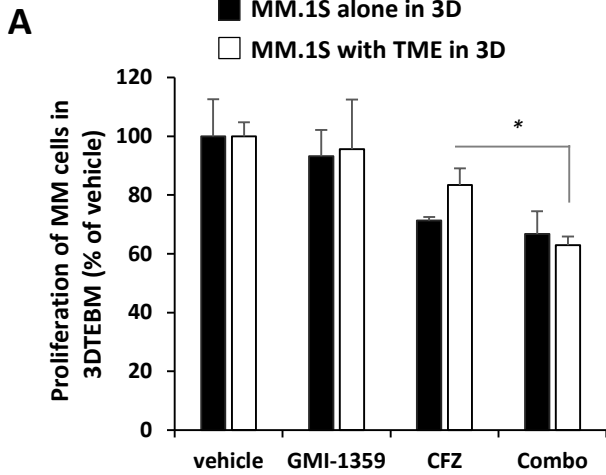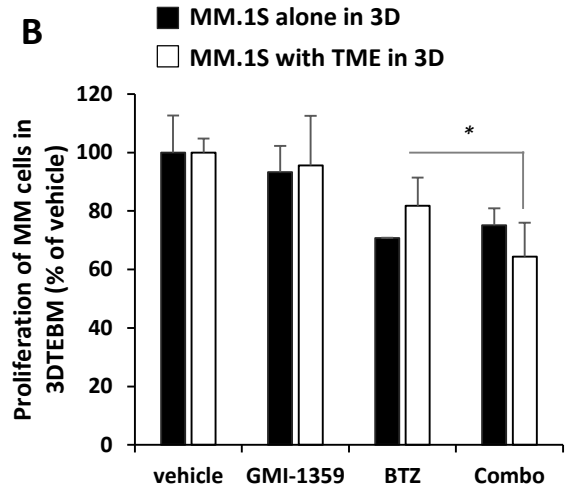

**Supplementary Figure 3 Combination of GMI-1359 with carfilzomib or bortezomib overcomes stroma-induced drug resistance in vitro in the 3D tissue culture model.** MM.1S-GFP cells were cultured with and without accessory cells (recapitulating tumor microenvironment, TME) and treated with or without GMI-1359 (25  $\mu$ M), alone or in combination with carfilzomib (CFZ; 10 nM) (**A**) or bortezomib (BTZ; 10 nM) (**B**) in 3DTEBM for 48 hours. Scaffolds were then digested with collagenase and the number of surviving MM.1S-GFP+ cells was analyzed by flow cytometry. Results are representative of at least three independent experiments and demonstrated as mean  $\pm$  s.e.m. with statistical significance for  $p$  values less than 0.05 calculated using unpaired Student's  $t$ -test (\* $p$ <0.05).
